# Supplementary material for: A Study on the Psychological Wound of COVID-19 in University Students
Source: Frontiers journal article supplement (doi:10.3389/fpsyg.2021.589927), 2021-01-26
Supplement: Table_1.PDF [file Table_1.PDF]

## Supplementary Material

Table 1S. Distribution of items across the five stressor domains, along with means and SDs for this study.

| Stressors                                                               | Mean (SD)   | Range |
|-------------------------------------------------------------------------|-------------|-------|
| <b>Academic stressors (<math>\alpha = 0.80</math>, MIC = 0.40)</b>      |             |       |
| Academic future in the long-term                                        | 3.16 (0.98) | 1-4   |
| Academic record damages due to the COVID-19 crisis                      | 2.91 (1.08) | 1-4   |
| Laboral future                                                          | 3.11 (1.06) | 1-4   |
| Not receiving the expected academic training                            | 3.16 (0.95) | 1-4   |
| Uncertainty about academic evaluation                                   | 3.45 (0.91) | 1-4   |
| Financial difficulties                                                  | 2.60 (1.07) | 1-4   |
| <b>Social distancing (<math>\alpha = 0.71</math>, MIC = 0.34)</b>       |             |       |
| Lack of face-to-face contact (with loved ones)                          | 3.30 (0.82) | 1-4   |
| Staying at home for so long                                             | 2.98 (1.00) | 1-4   |
| Upcoming lifestyle changes due the COVID-19 crisis                      | 3.12 (0.89) | 1-4   |
| Loneliness                                                              | 2.61 (1.13) | 1-4   |
| Delaying or cancelling plans                                            | 2.73 (1.00) | 1-4   |
| <b>Pandemic (<math>\alpha = 0.73</math>, MIC = 0.36)</b>                |             |       |
| The risk of loved ones (or yourself) become infected                    | 2.90 (0.90) | 1-4   |
| The human losses (caused by COVID-19)                                   | 3.06 (0.88) | 1-4   |
| Someone close (or yourself) being affected by COVID-19                  | 1.93 (1.01) | 1-4   |
| The economic future of society                                          | 3.40 (0.71) | 1-4   |
| The uncertainty about the COVID-19 crisis                               | 3.36 (0.76) | 1-4   |
| <b>General overload (<math>\alpha = .71</math>, MIC = 0.39)</b>         |             |       |
| The academic homework overload                                          | 3.12 (1.06) | 1-4   |
| Difficulties adapting to online learning                                | 2.93 (1.06) | 1-4   |
| Lack of free time                                                       | 2.53 (1.12) | 1-4   |
| The impossibility of dedicating time to hobbies and interests           | 2.80 (1.00) | 1-4   |
| <b>Interpersonal conflicts (<math>\alpha = 0.69</math>, MIC = 0.35)</b> |             |       |
| (Intensification of) family conflicts                                   | 2.26 (1.12) | 1-4   |
| Worsening cohabit relations                                             | 2.50 (1.08) | 1-4   |
| Looking after other people                                              | 1.68 (0.91) | 1-4   |
| Breaking-up with partner                                                | 1.53 (0.96) | 1-4   |

Table 2S. Distribution of items across the four domains of coping strategies, along with means and SDs for this study.

| Coping Strategies                                                                   | Mean (SD)   | Range |
|-------------------------------------------------------------------------------------|-------------|-------|
| <b>Oriented to others (<math>\alpha = 0.72</math>, MIC = 0.40)</b>                  |             |       |
| Looking for understanding and emotional support from others                         | 1.63 (0.95) | 0-3   |
| Trying to get help and advice from other people                                     | 1.15 (0.88) | 0-3   |
| Expressing negative feelings                                                        | 1.44 (0.99) | 0-3   |
| Helping others with their own difficulties                                          | 1.72 (0.81) | 0-3   |
| <b>Reframing (<math>\alpha = 0.57</math>, MIC = 0.31)</b>                           |             |       |
| Accepting the fact that this is happening and adapting to the situation             | 2.02 (0.77) | 0-3   |
| Looking for something good in what is happening                                     | 1.35 (0.96) | 0-3   |
| Concentrating efforts on looking for a solution to resolve difficulties             | 1.57 (0.81) | 0-3   |
| <b>Activities (<math>\alpha = 0.70</math>, MIC = 0.54)</b>                          |             |       |
| Doing something to be distracted from difficulties                                  | 1.88 (0.87) | 0-3   |
| Doing relaxing activities                                                           | 1.73 (0.85) | 0-3   |
| <b>Structure/Healthy routines (<math>\alpha = 0.63</math>, MIC = 0.46)</b>          |             |       |
| Trying to keep some routines and schedules                                          | 1.45 (0.97) | 0-3   |
| Taking care of one's health (nutrition, exercise...) to be psychologically stronger | 1.35 (1.01) | 0-3   |
| <b>Items which did not load in any factor</b>                                       |             |       |
| Trying to find relief in my spiritual or religious beliefs                          | 0.25 (0.61) | 0-3   |
| Making fun of the situation                                                         | 1.23 (0.97) | 0-3   |
| Consuming alcohol or other substances to feel better                                | 0.29 (0.67) | 0-3   |
